# Supplementary material
Source: PubMed Central journal article supplement (PMC6403015)
Supplement: NIHMS1513053-supplement-234_2018_2135_MOESM1_ESM.pdf [file NIHMS1513053-supplement-234_2018_2135_MOESM1_ESM.pdf]

*Neuroradiology*

**Associations of hemodynamics, morphology, and patient characteristics with aneurysm rupture stratified by aneurysm location – Supplementary Material**

Felicitas J. Detmer, Bong Jae Chung, Carlos Jimenez, Farid Hamzei-Sichani, David Kallmes, Christopher Putman, Juan R. Cebal

**Corresponding Author:**

Felicitas J. Detmer  
Bioengineering Department  
Volgenau School of Engineering  
George Mason University  
4400 University Drive  
Fairfax, VA 22030, USA  
Email: [fdetmer@gmu.edu](mailto:fdetmer@gmu.edu)

**Tab. 1** Computed hemodynamic and geometric parameters.

|              | <b>Variable</b>                                                   | <b>Definition</b>                                             |
|--------------|-------------------------------------------------------------------|---------------------------------------------------------------|
| Hemodynamics | ICI                                                               | Inflow concentration index                                    |
|              | Q [cm <sup>3</sup> /s]                                            | Mean inflow rate into aneurysm                                |
|              | KE [erg]                                                          | Mean kinetic energy                                           |
|              | SR [1/s]                                                          | Mean shear rate                                               |
|              | VE [cm/s]                                                         | Mean velocity                                                 |
|              | VO [1/s]                                                          | Mean vorticity                                                |
|              | VD [erg/s]                                                        | Mean viscous dissipation                                      |
|              | WSSmax [dyne/cm <sup>2</sup> ]                                    | Maximum wall shear stress                                     |
|              | WSSmin [dyne/cm <sup>2</sup> ]                                    | Minimum wall shear stress                                     |
|              | WSSmean [dyne/cm <sup>2</sup> ]                                   | Mean wall shear stress                                        |
|              | LSA (%)                                                           | Low shear area                                                |
|              | SCI                                                               | Shear concentration index                                     |
|              | OSImax                                                            | Maximum oscillatory shear index                               |
|              | OSImean                                                           | Mean oscillatory shear index                                  |
|              | WSSves [dyne/cm <sup>2</sup> ]                                    | Mean wall shear stress in parent vessel                       |
|              | WSSnorm                                                           | Normalized WSS = WSSmean/WSSves                               |
|              | MWSSnorm                                                          | Maximum normalized WSS = WSSmax/WSSves                        |
|              | Corelen [cm]                                                      | Vortex core line length (flow complexity)                     |
| podent       | Proper orthogonal decomposition (POD) entropy<br>(flow stability) |                                                               |
| Vmax [cm/s]  | Peak velocity                                                     |                                                               |
| Morphology   | Avol [cm <sup>3</sup> ]                                           | Aneurysm volume                                               |
|              | Asize [cm]                                                        | Max. distance between any two points on the aneurysm surface  |
|              | Nsize [cm]                                                        | Max. distance between any two points on the neck surface      |
|              | Narea [cm <sup>2</sup> ]                                          | Area of the neck surface                                      |
|              | AR                                                                | Aspect ratio = aneurysm depth/neck diameter                   |
|              | Aheight [cm]                                                      | Max. normal distance of all points on dome from aneurysm neck |

|             |                                                                                                                                              |
|-------------|----------------------------------------------------------------------------------------------------------------------------------------------|
| Awidth [cm] | Max. diameter of aneurysm slices parallel to aneurysm neck                                                                                   |
| HWR         | Height to width ratio = aneurysm height/ aneurysm width                                                                                      |
| BF          | Bottle neck factor = aneurysm width/neck diameter                                                                                            |
| BL          | Bulge location = Distance of plane with largest diameter from neck / height                                                                  |
| Vdiam [cm]  | Vessel diameter: Diameter of nearest vessel from aneurysm neck                                                                               |
| SizeR       | Size ratio = Aneurysm size/Vessel diameter                                                                                                   |
| VOR         | Volume to ostium ratio = Aneurysm volume/Area 2D of neck                                                                                     |
| CR          | Convexity ratio = Aneurysm volume/Volume of convex hull                                                                                      |
| EI          | Ellipticity index = $1-(18\pi)^{1/3} (V^{2/3}/ S)$ , with V and S referring to the volume and area of the aneurysm convex hull, respectively |
| NSI         | Non-sphericity index = $1-(18\pi)^{1/3} (V^{2/3}/ S)$ , with V and S referring to the aneurysm volume and area, respectively                 |
| MLN         | L2-Normof mean curvature                                                                                                                     |

**Tab. 2** Results of the univariate comparison of ruptured (R) and unruptured (U) aneurysms from all aneurysm locations combined. The p-value refers to the Wald test, the coefficient to the coefficient of the fitted univariate logistic regression model

|                                 | p-value | coefficient | Mean U    | Mean R    |
|---------------------------------|---------|-------------|-----------|-----------|
| ICI                             | 0.0001  | 0.2451      | 0.6467    | 0.796     |
| Q [cm <sup>3</sup> /s]          | 0.0040  | 0.1832      | 0.6129    | 0.7225    |
| KE [erg]                        | <0.0001 | 6e-04       | 184.3329  | 275.0735  |
| SR [1/s]                        | 0.4245  | 2e-04       | 220.0604  | 228.5415  |
| VE [cm/s]                       | 0.0015  | 0.0224      | 8.7014    | 9.809     |
| VO [1/s]                        | 0.1769  | 2e-04       | 294.6923  | 313.7566  |
| VD [erg]                        | 0.0825  | 0           | 1325.7114 | 1987.4185 |
| WSSmax [dyne/cm <sup>2</sup> ]  | <0.0001 | 0.0021      | 214.9645  | 376.2737  |
| WSSmin [dyne/cm <sup>2</sup> ]  | <0.0001 | -0.4224     | 0.7912    | 0.3432    |
| WSSmean [dyne/cm <sup>2</sup> ] | 0.0094  | 0.0058      | 19.9966   | 22.9593   |
| LSA                             | 0.4243  | 0.0012      | 50.7062   | 52.0456   |
| SCI                             | <0.0001 | 0.0414      | 4.5397    | 6.2606    |

|                          |         |         |         |         |
|--------------------------|---------|---------|---------|---------|
| OSImax                   | <0.0001 | 3.8827  | 0.2523  | 0.3172  |
| OSImean                  | <0.0001 | 16.7551 | 0.0128  | 0.0171  |
| WSSves                   | <0.0001 | 0.0141  | 39.4009 | 49.1429 |
| [dyne/cm <sup>2</sup> ]  |         |         |         |         |
| WSSnorm                  | <0.0001 | -0.6468 | 0.5068  | 0.4427  |
| MWSSnorm                 | <0.0001 | 0.0753  | 5.556   | 7.1606  |
| Corelen                  | <0.0001 | 0.1433  | 1.4563  | 2.3363  |
| [cm]                     |         |         |         |         |
| podent                   | <0.0001 | 1.4844  | 0.1755  | 0.2066  |
| Vmax                     | <0.0001 | 0.0113  | 62.5709 | 88.6712 |
| [cm/s]                   |         |         |         |         |
| Avol [cm <sup>3</sup> ]  | 0.3890  | -0.0825 | 0.1802  | 0.1502  |
| Asize [cm]               | <0.0001 | 0.6411  | 0.6444  | 0.7699  |
| Aarea [cm <sup>2</sup> ] | 0.2902  | 0.0265  | 1.038   | 1.1403  |
| Nsize [cm]               | 0.3626  | -0.2115 | 0.4413  | 0.4311  |
| Narea [cm <sup>2</sup> ] | 0.0190  | -0.7874 | 0.1647  | 0.1418  |
| AR                       | <0.0001 | 0.9073  | 0.9117  | 1.2878  |
| Aheight                  | <0.0001 | 0.797   | 0.4089  | 0.5084  |
| [cm]                     |         |         |         |         |
| Awidth                   | 0.1303  | 0.2456  | 0.4658  | 0.4886  |
| [cm]                     |         |         |         |         |
| HWR                      | <0.0001 | 2.2427  | 0.8174  | 1.0215  |
| BF                       | <0.0001 | 0.7511  | 1.1731  | 1.3136  |
| BL                       | <0.0001 | 2.3648  | 0.2886  | 0.3558  |
| Vdiam [cm]               | <0.0001 | -4.9211 | 0.3746  | 0.3258  |
| SizeR                    | <0.0001 | 0.3805  | 1.7958  | 2.4797  |
| VOR                      | 0.0355  | 0.0674  | 0.6898  | 0.8705  |
| CR                       | 0.0003  | 1.5231  | 0.7615  | 0.7847  |
| EI                       | 0.0190  | -3.5194 | 0.2766  | 0.2725  |
| NSI                      | <0.0001 | 13.1368 | 0.2062  | 0.2456  |
| MLN                      | <0.0001 | 7.1515  | 0.2908  | 0.3598  |

**Tab. 3** Results of the ANOVA analysis of the interaction tests for the hemodynamic and morphological parameters with aneurysm location

| Variable | p-value |
|----------|---------|
| ICI      | 0.7612  |
| Q        | 0.1741  |
| KE       | 0.1089  |
| SR       | 0.4833  |
| VE       | 0.1523  |
| VO       | 0.4664  |
| VD       | 0.4314  |
| WSSmax   | 0.1214  |
| WSSmin   | 0.1086  |
| WSSmean  | 0.2124  |
| LSA      | 0.488   |
| SCI      | 0.417   |
| OSImax   | 0.2045  |
| OSImean  | 0.159   |
| WSSves   | 0.1922  |
| WSSnorm  | 0.6202  |

|          |        |
|----------|--------|
| MWSSnorm | 0.5033 |
| corelen  | 0.5319 |
| podent   | 0.3196 |
| Vmax     | 0.0178 |
| Avol     | 0.9821 |
| Asize    | 0.8148 |
| Aarea    | 0.9927 |
| Nsize    | 0.8125 |
| Narea    | 0.8834 |
| AR       | 0.2023 |
| Aheight  | 0.9519 |
| Awidth   | 0.9179 |
| HWR      | 0.9463 |
| BF       | 0.68   |
| BL       | 0.0077 |
| Vdiam    | 0.98   |
| SizeR    | 0.9828 |
| VOR      | 0.8395 |
| CR       | 0.304  |
| EI       | 0.2065 |
| NSI      | 0.0024 |
| MLN      | 0.027  |

**Tab. 4** Results of the univariate comparison of ruptured (R) and unruptured (U) ACOM aneurysms (left) and ACOM aneurysms harbored by old vs. young patients (right). The p-value refers to the Wald test, the coefficient to the coefficient of the fitted univariate logistic regression model

|                                 | <b>p-value</b> | <b>coefficient</b> | <b>Mean U</b> | <b>Mean R</b> | <b>p-value</b> | <b>coefficient</b> | <b>Mean old</b> | <b>Mean young</b> |
|---------------------------------|----------------|--------------------|---------------|---------------|----------------|--------------------|-----------------|-------------------|
| ICI                             | 0.2343         | 0.2528             | 0.6232        | 0.7156        | 0.2833         | -0.2569            | 0.6844          | 0.6037            |
| Q [cm <sup>3</sup> /s]          | 0.4133         | 0.1997             | 0.5721        | 0.6238        | 0.5527         | -0.1527            | 0.596           | 0.5561            |
| KE [erg]                        | 0.5169         | 2e-04              | 232.4929      | 274.1671      | 0.4448         | -2e-04             | 272.3959        | 218.5205          |
| SR [1/s]                        | 0.7684         | 2e-04              | 221.6393      | 229.5976      | 0.2928         | -7e-04             | 236.022         | 205.3531          |
| VE [cm/s]                       | 0.3272         | 0.0158             | 8.802         | 9.767         | 0.6254         | -0.0081            | 9.2936          | 8.7838            |
| VO [1/s]                        | 0.6252         | 2e-04              | 299.217       | 317.8603      | 0.3474         | -4e-04             | 320.8933        | 282.4555          |
| VD [erg]                        | 0.9617         | 0                  | 1820.342      | 1849.301      | 0.405          | 0                  | 2064.207        | 1494.501          |
|                                 |                |                    | 6             | 5             |                |                    | 6               | 8                 |
| WSSmax [dyne/cm <sup>2</sup> ]  | 0.0262         | 8e-04              | 275.428       | 542.0168      | 0.4617         | -1e-04             | 515.529         | 360.521           |
| WSSmin [dyne/cm <sup>2</sup> ]  | 0.0041         | -0.6674            | 0.5149        | 0.2141        | 0.0498         | -0.4388            | 0.4689          | 0.2323            |
| WSSmean [dyne/cm <sup>2</sup> ] | 0.5786         | 0.0025             | 21.6977       | 23.6352       | 0.4898         | -0.0033            | 23.4564         | 20.8515           |
| LSA                             | 0.9035         | 5e-04              | 42.2274       | 42.7097       | 0.2018         | 0.0051             | 40.464          | 45.9596           |
| SCI                             | 0.044          | 0.0677             | 4.4746        | 5.8133        | 0.307          | 0.0259             | 5.0128          | 5.7911            |
| OSImax                          | 0.0353         | 2.2825             | 0.2825        | 0.3122        | 0.9675         | 0.0466             | 0.2968          | 0.2974            |
| OSImean                         | 0.086          | 19.2741            | 0.0134        | 0.0161        | 0.5759         | 6.1532             | 0.0142          | 0.0151            |
| WSSves [dyne/cm <sup>2</sup> ]  | 0.1169         | 0.0073             | 37.2077       | 43.2325       | 0.8121         | -0.0012            | 39.3644         | 38.5198           |
| WSSnorm                         | 0.4994         | -0.2573            | 0.5326        | 0.506         | 0.1261         | -0.6092            | 0.5525          | 0.4846            |
| MWSSnorm                        | 0.0041         | 0.0843             | 6.791         | 10.0157       | 0.4088         | -0.0115            | 9.6526          | 8.2024            |
| Corelen [cm]                    | 0.0198         | 0.1946             | 1.472         | 1.9516        | 0.8684         | 0.0139             | 1.6252          | 1.6592            |

|                          |        |         |         |         |        |         |         |         |
|--------------------------|--------|---------|---------|---------|--------|---------|---------|---------|
| podent                   | 0.5007 | 0.6196  | 0.1957  | 0.2071  | 0.6797 | 0.4176  | 0.19    | 0.1971  |
| Vmax<br>[cm/s]           | 0.0338 | 0.0047  | 74.5873 | 92.4203 | 0.6771 | -8e-04  | 83.4281 | 79.8845 |
| Avol [cm <sup>3</sup> ]  | 0.4148 | -0.8325 | 0.093   | 0.0811  | 0.1446 | -1.8691 | 0.0907  | 0.0693  |
| Asize [cm]               | 0.0554 | 0.8578  | 0.6407  | 0.7085  | 0.6708 | 0.2012  | 0.6606  | 0.676   |
| Aarea [cm <sup>2</sup> ] | 0.7604 | 0.0511  | 0.8262  | 0.8539  | 0.4525 | -0.1405 | 0.8432  | 0.7734  |
| Nsize [cm]               | 0.4988 | -0.5381 | 0.4251  | 0.4123  | 0.7519 | -0.2787 | 0.4172  | 0.4111  |
| Narea [cm <sup>2</sup> ] | 0.1585 | -1.8452 | 0.143   | 0.1261  | 0.6125 | -0.7954 | 0.1327  | 0.1271  |
| AR                       | 3e-04  | 1.1038  | 1.0027  | 1.2063  | 0.1046 | 0.4934  | 1.0553  | 1.1491  |
| Aheight<br>[cm]          | 0.3037 | 0.572   | 0.4267  | 0.4552  | 0.7974 | 0.1517  | 0.4295  | 0.4369  |
| Awidth [cm]              | 0.9271 | -0.0612 | 0.4486  | 0.4466  | 0.5251 | -0.4683 | 0.4462  | 0.4314  |
| HWR                      | 6e-04  | 1.7508  | 0.9045  | 1.0191  | 0.007  | 1.3878  | 0.9183  | 1.0158  |
| BF                       | 0.0144 | 1.2193  | 1.1973  | 1.2785  | 0.4512 | -0.3623 | 1.2523  | 1.2251  |
| BL                       | 0.0733 | 1.519   | 0.3169  | 0.3492  | 0.8263 | 0.1942  | 0.325   | 0.3293  |
| Vdiam [cm]               | 0.011  | -5.2472 | 0.3007  | 0.2804  | 0.687  | 0.8598  | 0.2847  | 0.2879  |
| SizeR                    | 0.0032 | 0.3749  | 2.1877  | 2.6054  | 0.9923 | -0.0011 | 2.4288  | 2.4273  |
| VOR                      | 0.1161 | 0.4129  | 0.539   | 0.637   | 0.3998 | -0.2227 | 0.6063  | 0.5507  |
| CR                       | 0.4482 | -0.962  | 0.7944  | 0.7853  | 0.7033 | -0.4843 | 0.7827  | 0.7775  |
| EI                       | 0.1412 | 8.1047  | 0.2661  | 0.2703  | 0.8476 | 1.022   | 0.2692  | 0.2698  |
| NSI                      | <0.000 | 21.9256 | 0.2073  | 0.2494  | 0.0039 | 7.9067  | 0.2252  | 0.2447  |
| 1                        |        |         |         |         |        |         |         |         |
| MLN                      | <0.000 | 10.9645 | 0.3041  | 0.362   | 0.0281 | 3.6632  | 0.3302  | 0.3538  |
| 1                        |        |         |         |         |        |         |         |         |

**Tab. 5** Results of the univariate comparison of ruptured (R) and unruptured (U) ACOM aneurysms harbored by young patients (left) and harbored by old patients (right). The p-value refers to the Wald test, the coefficient to the coefficient of the fitted univariate logistic regression model

|                                    | <b>p-value</b> | <b>Coefficient</b> | <b>Mean young U</b> | <b>MEAN young R</b> | <b>p-value</b> | <b>Coefficient</b> | <b>Mean old U</b> | <b>Mean old R</b> |
|------------------------------------|----------------|--------------------|---------------------|---------------------|----------------|--------------------|-------------------|-------------------|
| ICI                                | 0.4883         | 0.3434             | 0.5576              | 0.6241              | 0.1867         | 0.4313             | 0.5993            | 0.7689            |
| Q [cm <sup>3</sup> /s]             | 0.7762         | 0.1348             | 0.5392              | 0.567               | 0.9758         | -0.0102            | 0.6093            | 0.6061            |
| KE [erg]                           | 0.7777         | 2e-04              | 204.0542            | 225.7086            | 0.8339         | 1e-04              | 262.6595          | 288.5767          |
| SR [1/s]                           | 0.9843         | 0                  | 205.3682            | 206.1532            | 0.9364         | 1e-04              | 235.1282          | 238.8652          |
| VE [cm/s]                          | 0.8336         | 0.0063             | 8.5801              | 8.9041              | 0.686          | 0.009              | 9.0392            | 9.698             |
| VO [1/s]                           | 0.9494         | 1e-04              | 280.6865            | 284.2629            | 0.7901         | 1e-04              | 312.6689          | 330.1895          |
| VD [erg]                           | 0.8827         | 0                  | 1585.2084           | 1474.9611           | 0.9775         | 0                  | 2079.4657         | 2112.792          |
| WSSmax<br>[dyne/cm <sup>2</sup> ]  | 0.9482         | 0                  | 353.7587            | 360.4692            | 0.0306         | 0.0021             | 219.7857          | 761.4119          |
| WSSmin<br>[dyne/cm <sup>2</sup> ]  | 0.0172         | -1.1447            | 0.4404              | 0.1594              | 0.1019         | -0.4243            | 0.6534            | 0.2809            |
| WSSmean<br>[dyne/cm <sup>2</sup> ] | 0.9293         | -8e-04             | 21.2877             | 20.8292             | 0.7009         | 0.0023             | 22.3671           | 24.7275           |
| LSA                                | 0.3096         | -0.0069            | 50.7298             | 43.791              | 0.778          | -0.0016            | 41.6538           | 39.9107           |
| SCI                                | 0.3035         | 0.0597             | 4.7032              | 6.0778              | 0.2884         | 0.0465             | 4.5523            | 5.5682            |
| OSImax                             | 0.0452         | 4.1311             | 0.2639              | 0.3094              | 0.6201         | 0.763              | 0.2939            | 0.3053            |
| OSImean                            | 0.1433         | 36.1445            | 0.0123              | 0.0161              | 0.3762         | 14.8317            | 0.0133            | 0.0153            |
| WSSves<br>[dyne/cm <sup>2</sup> ]  | 0.9834         | 2e-04              | 38.4013             | 38.5221             | 0.0499         | 0.0172             | 34.1171           | 44.5341           |
| WSSnorm                            | 0.9674         | -0.0296            | 0.4887              | 0.4861              | 0.2477         | -0.61              | 0.5905            | 0.5117            |
| MWSSnorm                           | 0.5715         | 0.0251             | 7.6894              | 8.3219              | 0.0133         | 0.1459             | 6.2244            | 12.4047           |
| Corelen<br>[cm]                    | 0.0196         | 0.4955             | 1.1395              | 1.8593              | 0.3421         | 0.1085             | 1.4853            | 1.7959            |

|                          |        |         |         |         |        |         |         |         |
|--------------------------|--------|---------|---------|---------|--------|---------|---------|---------|
| podent                   | 0.237  | 2.5005  | 0.1743  | 0.2055  | 0.5845 | 0.7647  | 0.1844  | 0.1986  |
| Vmax<br>[cm/s]           | 0.3048 | 0.0043  | 70.0757 | 83.3841 | 0.0897 | 0.0062  | 71.1612 | 94.7683 |
| Avol [cm <sup>3</sup> ]  | 0.2413 | 3.9243  | 0.0551  | 0.075   | 0.4648 | -1.0321 | 0.1032  | 0.0846  |
| Asize [cm]               | 0.0515 | 1.9854  | 0.6065  | 0.7035  | 0.4493 | 0.4561  | 0.6425  | 0.6877  |
| Aarea [cm <sup>2</sup> ] | 0.1171 | 0.7208  | 0.6356  | 0.8283  | 0.83   | -0.0488 | 0.8777  | 0.8444  |
| Nsize [cm]               | 0.5476 | -0.989  | 0.4244  | 0.408   | 0.4093 | -0.9331 | 0.4357  | 0.4098  |
| Narea [cm <sup>2</sup> ] | 0.6651 | -1.2151 | 0.1329  | 0.1261  | 0.0857 | -3.5887 | 0.1519  | 0.1216  |
| AR                       | 9e-04  | 2.2034  | 0.9282  | 1.2262  | 0.0218 | 1.0007  | 0.9471  | 1.1487  |
| Aheight<br>[cm]          | 0.0749 | 2.3447  | 0.3857  | 0.4564  | 0.9506 | 0.0459  | 0.4336  | 0.4365  |
| Awidth<br>[cm]           | 0.3095 | 1.4969  | 0.4084  | 0.4414  | 0.4176 | -0.7579 | 0.4674  | 0.4365  |
| HWR                      | 0.0202 | 2.2046  | 0.9145  | 1.0493  | 0.032  | 1.6318  | 0.8652  | 0.9723  |
| BF                       | 0.0051 | 3.3192  | 1.1182  | 1.2635  | 0.1608 | 0.9242  | 1.2053  | 1.2861  |
| BL                       | 9e-04  | 5.256   | 0.2448  | 0.3568  | 0.6049 | 0.6869  | 0.3186  | 0.3324  |
| Vdiam [cm]               | 0.2516 | -3.7761 | 0.3004  | 0.2847  | 0.0025 | -10.911 | 0.3046  | 0.2693  |
| SizeR                    | 0.0363 | 0.5794  | 2.1234  | 2.5352  | 0.0724 | 0.2815  | 2.1862  | 2.6652  |
| VOR                      | 0.021  | 1.7878  | 0.4021  | 0.6059  | 0.4074 | 0.2753  | 0.5604  | 0.6529  |
| CR                       | 0.944  | 0.1798  | 0.7757  | 0.777   | 0.9024 | -0.2068 | 0.7861  | 0.7836  |
| EI                       | 0.6965 | 4.6207  | 0.2688  | 0.2703  | 0.2191 | 8.8898  | 0.2651  | 0.2716  |
| NSI                      | 3e-04  | 20.7491 | 0.2139  | 0.2561  | 0      | 25.4252 | 0.2006  | 0.2436  |
| MLN                      | 6e-04  | 13.114  | 0.3123  | 0.3694  | 9e-04  | 8.4292  | 0.3012  | 0.3575  |

**Tab. 6** Results of the univariate comparison of ruptured (R) and unruptured (U) MCA-BIF aneurysms (left) and MCA-BIF aneurysms harbored by old vs. young patients (right). The p-value refers to the Wald test, the coefficient to the coefficient of the fitted univariate logistic regression model

|                                 | <b>p-value</b> | <b>Coefficient</b> | <b>Mean U</b> | <b>Mean R</b> | <b>p-value</b> | <b>Coefficient</b> | <b>Mean old</b> | <b>Mean young</b> |
|---------------------------------|----------------|--------------------|---------------|---------------|----------------|--------------------|-----------------|-------------------|
| ICI                             | 0.5888         | 0.0981             | 0.7312        | 0.7802        | 0.7519         | -0.0592            | 0.7145          | 0.6871            |
| Q [cm <sup>3</sup> /s]          | 0.3268         | 0.2005             | 0.6285        | 0.7068        | 0.4955         | -0.1426            | 0.6472          | 0.5934            |
| KE [erg]                        | 0.1416         | 5e-04              | 233.0808      | 403.5371      | 0.381          | 2e-04              | 246.3972        | 331.1519          |
| SR [1/s]                        | 0.3285         | 4e-04              | 252.2168      | 292.4574      | 0.6478         | 2e-04              | 260.4378        | 278.4133          |
| VE [cm/s]                       | 0.2771         | 0.0173             | 9.9521        | 11.0758       | 0.9232         | 0.0015             | 10.1132         | 10.2097           |
| VO [1/s]                        | 0.3026         | 3e-04              | 340.9291      | 394.4172      | 0.6471         | 1e-04              | 350.3209        | 372.9479          |
| VD [erg]                        | 0.4799         | 0                  | 1612.772      | 4432.1009     | 0.4154         | 0                  | 1767.851        | 3686.4358         |
| WSSmax [dyne/cm <sup>2</sup> ]  | 0.0035         | 0.0018             | 251.5355      | 342.4706      | 0.1948         | 7e-04              | 259.6591        | 296.7925          |
| WSSmin [dyne/cm <sup>2</sup> ]  | 0.1383         | -0.1831            | 0.9715        | 0.5358        | 0.4376         | -0.0555            | 0.9599          | 0.7118            |
| WSSmean [dyne/cm <sup>2</sup> ] | 0.3221         | 0.0042             | 24.4611       | 28.4876       | 0.5891         | 0.0023             | 24.6513         | 26.7565           |
| LSA                             | 0.6214         | 0.002              | 50.1214       | 52.2105       | 0.6391         | -0.0018            | 51.8102         | 49.8818           |
| SCI                             | 0.013          | 0.0724             | 4.016         | 5.5786        | 0.2406         | 0.0346             | 4.1095          | 4.7587            |
| OSImax                          | 0.0023         | 3.0578             | 0.2511        | 0.3063        | 0.2943         | 0.9651             | 0.2553          | 0.2737            |
| OSImean                         | 2e-04          | 36.0493            | 0.0108        | 0.0191        | 0.0421         | 17.4644            | 0.0116          | 0.0158            |
| WSSves [dyne/cm <sup>2</sup> ]  | 0.0091         | 0.0106             | 44.9416       | 55.9354       | 0.0722         | 0.0073             | 45.6356         | 53.0239           |
| WSSnorm                         | 0.0174         | -1.022             | 0.5572        | 0.4486        | 0.2967         | -0.4135            | 0.531           | 0.4874            |
| MWSSnorm                        | 0.3551         | 0.0433             | 5.7961        | 6.12          | 0.1993         | 0.0616             | 5.5807          | 6.0137            |
| Corelen [cm]                    | 0.0336         | 0.1248             | 1.3817        | 1.9996        | 0.353          | -0.0585            | 1.5922          | 1.3358            |
| podent                          | 0.1203         | 1.1806             | 0.168         | 0.2026        | 0.6268         | 0.3634             | 0.1703          | 0.1807            |
| Vmax [cm/s]                     | 0.0097         | 0.0058             | 78.7448       | 98.9205       | 0.6925         | 9e-04              | 80.8263         | 83.6803           |
| Avol [cm <sup>3</sup> ]         | 0.9239         | 0.0454             | 0.1122        | 0.1155        | 0.3129         | -0.6111            | 0.1158          | 0.0818            |
| Asize [cm]                      | 0.0278         | 0.7835             | 0.622         | 0.7245        | 0.5375         | -0.229             | 0.6416          | 0.6145            |
| Aarea [cm <sup>2</sup> ]        | 0.4824         | 0.0711             | 0.8605        | 0.9722        | 0.3021         | -0.1249            | 0.8903          | 0.7362            |
| Nsize [cm]                      | 0.6613         | -0.3644            | 0.4224        | 0.4135        | 0.0619         | -1.5744            | 0.4273          | 0.389             |
| Narea [cm <sup>2</sup> ]        | 0.455          | -1.0944            | 0.1362        | 0.1273        | 0.0785         | -2.6322            | 0.137           | 0.1163            |
| AR                              | 0.0033         | 0.5779             | 0.9502        | 1.2148        | 0.5205         | 0.1223             | 0.9815          | 1.0354            |
| Aheight [cm]                    | 0.1587         | 0.5657             | 0.4097        | 0.467         | 0.3484         | -0.4016            | 0.4237          | 0.3873            |
| Awidth [cm]                     | 0.9707         | -0.0201            | 0.4454        | 0.4443        | 0.1051         | -0.9759            | 0.447           | 0.3998            |
| HWR                             | 1e-04          | 1.6044             | 0.8513        | 1.0157        | 0.2482         | 0.4471             | 0.8737          | 0.9218            |
| BF                              | 0.3848         | 0.2717             | 1.2029        | 1.2482        | 0.7645         | -0.0976            | 1.1987          | 1.1838            |
| BL                              | 0.8547         | 0.1434             | 0.334         | 0.3379        | 0.7054         | 0.2874             | 0.3237          | 0.3317            |
| Vdiam [cm]                      | 0.1151         | -3.1986            | 0.2986        | 0.285         | 0.0345         | -4.3042            | 0.3012          | 0.2834            |
| SizeR                           | 0.007          | 0.2614             | 2.1436        | 2.6133        | 0.5759         | 0.0541             | 2.1783          | 2.2705            |
| VOR                             | 0.7202         | 0.0318             | 0.6871        | 0.7518        | 0.3743         | -0.106             | 0.7232          | 0.5614            |
| CR                              | 0.6801         | -0.3981            | 0.7653        | 0.7582        | 0.917          | -0.0986            | 0.7566          | 0.7548            |
| EI                              | 0.1659         | 5.6617             | 0.268         | 0.2736        | 0.9627         | -0.1799            | 0.272           | 0.2718            |
| NSI                             | <0.0001        | 11.3047            | 0.208         | 0.2474        | 0.2603         | 2.3523             | 0.2172          | 0.2258            |
| MLN                             | <0.0001        | 7.232              | 0.2991        | 0.3572        | 0.3224         | 1.3313             | 0.309           | 0.3208            |



**Tab 7** Results of the univariate comparison of ruptured (R) and unruptured (U) MCA-BIF aneurysms harbored by young patients (left) and harbored by old patients (right). The p-value refers to the Wald test, the coefficient to the coefficient of the fitted univariate logistic regression model

|                                 | <b>p-value</b> | <b>Coefficient</b> | <b>Mean young U</b> | <b>Mean young R</b> | <b>p-value</b> | <b>Coefficient</b> | <b>Mean old U</b> | <b>Mean old R</b> |
|---------------------------------|----------------|--------------------|---------------------|---------------------|----------------|--------------------|-------------------|-------------------|
| ICI                             | 0.8134         | -0.0736            | 0.7123              | 0.6822              | 0.0903         | 0.4255             | 0.6657            | 0.9115            |
| Q [cm <sup>3</sup> /s]          | 0.464          | 0.2229             | 0.5595              | 0.6572              | 0.1348         | 0.4688             | 0.6102            | 0.7869            |
| KE [erg]                        | 0.4111         | 3e-04              | 240.1346            | 449.5998            | 0.0258         | 0.0016             | 203.5029          | 395.5829          |
| SR [1/s]                        | 0.6143         | 3e-04              | 256.9341            | 299.7802            | 0.1253         | 0.0014             | 243.1217          | 306.5891          |
| VE [cm/s]                       | 0.6481         | 0.0096             | 9.8528              | 10.7238             | 0.042          | 0.0584             | 9.4822            | 12.2729           |
| VO [1/s]                        | 0.6336         | 2e-04              | 347.785             | 397.5604            | 0.0741         | 0.0012             | 325.5206          | 423.5878          |
| VD [erg]                        | 0.5025         | 0                  | 1598.1338           | 6281.3427           | 0.0814         | 1e-04              | 1473.445          | 2602.1782         |
| WSSmax [dyne/cm <sup>2</sup> ]  | 0.1659         | 0.0013             | 267.8463            | 336.1276            | 0.01           | 0.0026             | 233.5078          | 361.6137          |
| WSSmin [dyne/cm <sup>2</sup> ]  | 0.1001         | -0.3249            | 0.8811              | 0.4483              | 0.6138         | -0.0619            | 0.963             | 0.6586            |
| WSSmean [dyne/cm <sup>2</sup> ] | 0.6096         | 0.0027             | 24.7869             | 28.9693             | 0.0961         | 0.0138             | 22.8495           | 30.317            |
| LSA                             | 0.1734         | 0.0084             | 46.2935             | 55.262              | 0.2662         | -0.0069            | 53.8683           | 46.8883           |
| SCI                             | 0.0701         | 0.0776             | 3.874               | 5.9669              | 0.6825         | 0.0237             | 4.1335            | 4.4007            |
| OSImax                          | 0.0298         | 3.444              | 0.2506              | 0.3093              | 0.0772         | 2.6217             | 0.2474            | 0.297             |
| OSImean                         | 0.0264         | 31.2507            | 0.0116              | 0.0214              | 0.0208         | 33.9496            | 0.0105            | 0.0164            |
| WSSves [dyne/cm <sup>2</sup> ]  | 0.2065         | 0.007              | 48.8055             | 58.3854             | 0.0555         | 0.0129             | 43.0271           | 53.7093           |
| WSSnorm                         | 0.0297         | -1.4493            | 0.5524              | 0.402               | 0.8169         | -0.1475            | 0.5319            | 0.5175            |
| MWSSnorm                        | 0.751          | -0.0226            | 6.1299              | 5.9523              | 0.094          | 0.1199             | 5.4463            | 6.3117            |
| Corelen [cm]                    | 0.059          | 0.3036             | 0.9979              | 1.8003              | 0.1497         | 0.1103             | 1.4492            | 2.1327            |
| podent                          | 0.2377         | 1.4101             | 0.1594              | 0.2109              | 0.4901         | 0.9033             | 0.169             | 0.1884            |
| Vmax [cm/s]                     | 0.1357         | 0.0054             | 76.0261             | 94.2833             | 0.0193         | 0.0081             | 75.0541           | 104.1123          |
| Avol [cm <sup>3</sup> ]         | 0.7337         | 0.3132             | 0.0766              | 0.0915              | 0.4421         | -0.8459            | 0.1262            | 0.0816            |
| Asize [cm]                      | 0.0394         | 1.3817             | 0.5568              | 0.7019              | 0.3282         | 0.5177             | 0.6284            | 0.697             |
| Aarea [cm <sup>2</sup> ]        | 0.3356         | 0.2025             | 0.6548              | 0.8646              | 0.751          | -0.0545            | 0.9122            | 0.8347            |
| Nsize [cm]                      | 0.8174         | -0.3069            | 0.3958              | 0.3888              | 0.8765         | 0.1922             | 0.4234            | 0.4283            |
| Narea [cm <sup>2</sup> ]        | 0.7266         | -0.8754            | 0.1205              | 0.1149              | 0.8191         | -0.4863            | 0.1366            | 0.1323            |
| AR                              | 5e-04          | 1.5496             | 0.8241              | 1.3138              | 0.442          | 0.2068             | 0.9714            | 1.0763            |
| Aheight [cm]                    | 0.0505         | 1.6199             | 0.3406              | 0.4561              | 0.6922         | 0.2378             | 0.4207            | 0.4457            |
| Awidth [cm]                     | 0.4939         | 0.6819             | 0.392               | 0.4195              | 0.6052         | -0.4474            | 0.4522            | 0.4274            |
| HWR                             | 2e-04          | 3.0941             | 0.8139              | 1.0633              | 0.0476         | 1.144              | 0.852             | 0.9855            |
| BF                              | 0.1002         | 0.9767             | 1.1378              | 1.2551              | 0.7261         | -0.173             | 1.2079            | 1.1785            |
| BL                              | 0.1487         | 1.8053             | 0.3144              | 0.3621              | 0.194          | -1.5846            | 0.3392            | 0.2969            |
| Vdiam [cm]                      | 0.3195         | -3.0566            | 0.2889              | 0.2756              | 0.5332         | -1.9545            | 0.302             | 0.294             |
| SizeR                           | 0.0471         | 0.3303             | 2.037               | 2.6226              | 0.2312         | 0.1781             | 2.1268            | 2.4224            |
| VOR                             | 0.0773         | 0.5455             | 0.4414              | 0.7292              | 0.5029         | -0.1297            | 0.7893            | 0.5562            |
| CR                              | 0.6953         | 0.6371             | 0.7522              | 0.7618              | 0.445          | -1.0829            | 0.7647            | 0.7443            |
| EI                              | 0.3188         | 7.9703             | 0.2687              | 0.2738              | 0.4957         | 3.6315             | 0.2698            | 0.2745            |
| NSI                             | 0.0146         | 8.4912             | 0.2124              | 0.2439              | <0.0001        | 14.6457            | 0.2047            | 0.2556            |
| MLN                             | 0.0106         | 6.0188             | 0.3011              | 0.3509              | 3e-04          | 8.7344             | 0.2952            | 0.3651            |

**Tab. 8** Results of the univariate comparison of MCA-BIF aneurysms harbored by female (F) and male (M) patients. The p-value refers to the Wald test, the coefficient to the coefficient of the fitted univariate logistic regression model

|                                    | <b>p-value</b> | <b>Coefficient</b> | <b>Mean F</b> | <b>Mean M</b> |
|------------------------------------|----------------|--------------------|---------------|---------------|
| ICI                                | 0.1498         | 0.287              | 0.6733        | 0.818         |
| Q [cm <sup>3</sup> /s]             | 0.001          | 0.7525             | 0.5532        | 0.8729        |
| KE [erg]                           | 0.0053         | 0.0013             | 211.8363      | 524.5084      |
| SR [1/s]                           | 0.0603         | 0.0012             | 244.7384      | 352.6155      |
| VE [cm/s]                          | 0.0048         | 0.054              | 9.3914        | 13.0413       |
| VO [1/s]                           | 0.0391         | 0.001              | 328.9346      | 474.056       |
| VD [erg]                           | 0.0935         | 1e-04              | 1538.8709     | 5920.1965     |
| WSSmax<br>[dyne/cm <sup>2</sup> ]  | 0.0149         | 0.0015             | 256.5453      | 341.8491      |
| WSSmin<br>[dyne/cm <sup>2</sup> ]  | 0.5636         | 0.0297             | 0.8596        | 1.0767        |
| WSSmean<br>[dyne/cm <sup>2</sup> ] | 0.0224         | 0.014              | 22.8873       | 35.4114       |
| LSA                                | 0.1023         | -0.0073            | 52.6268       | 44.8792       |
| SCI                                | 0.5687         | 0.0184             | 4.2832        | 4.6404        |
| OSImax                             | 0.3555         | 0.9819             | 0.258         | 0.2767        |
| OSImean                            | 0.1786         | 11.4031            | 0.0125        | 0.0156        |
| WSSves<br>[dyne/cm <sup>2</sup> ]  | 0.0844         | 0.0073             | 46.9841       | 55.153        |
| WSSnorm                            | 0.0691         | 0.7665             | 0.4944        | 0.5825        |
| MWSSnorm                           | 0.4616         | 0.0392             | 5.6925        | 5.9749        |
| Corelen<br>[cm]                    | 0.0388         | 0.1277             | 1.3246        | 2.007         |
| podent                             | 0.4073         | 0.6632             | 0.1694        | 0.1898        |
| Vmax<br>[cm/s]                     | 0.0022         | 0.0076             | 76.0086       | 103.7639      |
| <hr/>                              |                |                    |               |               |
| Avol [cm <sup>3</sup> ]            | 0.4697         | 0.3692             | 0.0956        | 0.1229        |
| Asize [cm]                         | 0.0431         | 0.7997             | 0.6059        | 0.7098        |
| Aarea [cm <sup>2</sup> ]           | 0.2441         | 0.1324             | 0.7811        | 0.9814        |
| Nsize [cm]                         | 0.0255         | 1.9493             | 0.3991        | 0.4519        |
| Narea [cm <sup>2</sup> ]           | 0.0058         | 4.1149             | 0.1195        | 0.1576        |
| AR                                 | 0.6605         | 0.0942             | 0.9948        | 1.037         |
| Aheight<br>[cm]                    | 0.2149         | 0.559              | 0.3965        | 0.452         |
| Awidth<br>[cm]                     | 0.1593         | 0.8476             | 0.417         | 0.4641        |
| HWR                                | 0.5653         | 0.2531             | 0.8874        | 0.9147        |
| BF                                 | 0.9057         | -0.0444            | 1.1947        | 1.188         |
| BL                                 | 0.388          | 0.7546             | 0.323         | 0.3439        |
| Vdiam [cm]                         | 0.1134         | 3.4497             | 0.2901        | 0.3054        |
| SizeR                              | 0.2696         | 0.1171             | 2.1657        | 2.3749        |
| VOR                                | 0.8992         | -0.014             | 0.6645        | 0.6392        |
| CR                                 | 0.0634         | -1.9418            | 0.7654        | 0.7289        |
| EI                                 | 0.2622         | 4.6655             | 0.2704        | 0.2758        |
| NSI                                | 0.0059         | 6.5213             | 0.2143        | 0.2391        |
| MLN                                | 0.0695         | 2.803              | 0.3075        | 0.3325        |

**Tab. 9** Results of the univariate comparison of ruptured (R) and unruptured (U) MCA-BIF aneurysms harbored by female patients (left) and harbored by male patients (right). The p-value refers to the Wald test, the coefficient to the coefficient of the fitted univariate logistic regression model

|                                 | p-value | Coefficient | Mean F U | Mean F R | p-value | Coefficient | Mean M U | Mean M R  |
|---------------------------------|---------|-------------|----------|----------|---------|-------------|----------|-----------|
| ICI                             | 0.7846  | 0.0644      | 0.6683   | 0.6979   | 0.3553  | 0.3389      | 0.7663   | 0.9412    |
| Q [cm <sup>3</sup> /s]          | 0.773   | -0.0953     | 0.5587   | 0.5357   | 0.1929  | 0.4142      | 0.7671   | 1.0694    |
| KE [erg]                        | 0.7837  | -2e-04      | 212.847  | 202.5802 | 0.1183  | 0.001       | 273.4968 | 884.5797  |
| SR [1/s]                        | 0.4965  | -6e-04      | 247.009  | 226.3893 | 0.296   | 0.001       | 272.1006 | 458.0267  |
| VE [cm/s]                       | 0.5009  | -0.0181     | 9.5277   | 8.8619   | 0.0925  | 0.0489      | 10.7618  | 16.4854   |
| VO [1/s]                        | 0.504   | -5e-04      | 331.923  | 305.4006 | 0.2372  | 9e-04       | 368.5365 | 618.4595  |
| VD [erg]                        | 0.6716  | 0           | 1533.763 | 1377.715 | 0.29    | 1e-04       | 1810.864 | 11607.488 |
|                                 |         |             | 4        | 8        |         |             | 8        | 7         |
| WSSmax [dyne/cm <sup>2</sup> ]  | 0.4601  | 7e-04       | 251.6551 | 272.3473 | 0.0085  | 0.0046      | 234.9459 | 498.4892  |
| WSSmin [dyne/cm <sup>2</sup> ]  | 0.2687  | -0.181      | 0.9507   | 0.5199   | 0.2738  | -0.2139     | 1.2637   | 0.5693    |
| WSSmean [dyne/cm <sup>2</sup> ] | 0.2958  | -0.0099     | 23.5166  | 20.3729  | 0.1859  | 0.0123      | 26.2578  | 48.2033   |
| LSA                             | 0.4914  | 0.0035      | 52.1499  | 55.7358  | 0.7397  | -0.0028     | 46.3861  | 43.6681   |
| SCI                             | 0.241   | 0.0468      | 4.1388   | 4.877    | 0.1216  | 0.1068      | 3.6823   | 6.2009    |
| OSImax                          | 0.09    | 2.1018      | 0.2507   | 0.2877   | 0.0133  | 5.0628      | 0.238    | 0.3378    |
| OSImean                         | 0.0162  | 27.7852     | 0.0109   | 0.0174   | 0.0203  | 45.9089     | 0.0106   | 0.0231    |
| WSSves [dyne/cm <sup>2</sup> ]  | 0.4249  | 0.0042      | 45.6113  | 49.3638  | 0.0194  | 0.0209      | 44.7057  | 70.8407   |
| WSSnorm                         | 0.017   | -1.4514     | 0.5295   | 0.4043   | 0.613   | -0.3939     | 0.5887   | 0.5438    |
| MWSSnorm                        | 0.7497  | -0.0194     | 5.7831   | 5.644    | 0.0127  | 0.4029      | 5.2422   | 7.0369    |
| Corelen [cm]                    | 0.3039  | 0.078       | 1.2296   | 1.5646   | 0.1233  | 0.1861      | 1.5929   | 2.7027    |
| podent                          | 0.3471  | 0.892       | 0.1644   | 0.1893   | 0.2907  | 1.4952      | 0.1708   | 0.2264    |
| Vmax [cm/s]                     | 0.8256  | 8e-04       | 75.7536  | 77.3652  | 0.0119  | 0.012       | 79.0137  | 141.2455  |
| Avol [cm <sup>3</sup> ]         | 0.5436  | -0.4944     | 0.1023   | 0.0772   | 0.6537  | -0.469      | 0.1412   | 0.1083    |
| Asize [cm]                      | 0.2806  | 0.505       | 0.5918   | 0.6497   | 0.1646  | 1.0068      | 0.6604   | 0.802     |
| Aarea [cm <sup>2</sup> ]        | 0.953   | -0.0086     | 0.7848   | 0.7741   | 0.9983  | 4e-04       | 1.0102   | 1.0109    |
| Nsize [cm]                      | 0.6305  | -0.5662     | 0.4006   | 0.3897   | 0.5226  | -0.8911     | 0.469    | 0.4371    |
| Narea [cm <sup>2</sup> ]        | 0.4138  | -1.8328     | 0.1213   | 0.1111   | 0.373   | -2.0859     | 0.1719   | 0.1448    |
| AR                              | 0.0345  | 0.5091      | 0.9375   | 1.1716   | 0.0281  | 1.0023      | 0.8834   | 1.3022    |
| Aheight [cm]                    | 0.4195  | 0.4225      | 0.3869   | 0.4256   | 0.3931  | 0.7031      | 0.432    | 0.505     |
| Awidth [cm]                     | 0.5458  | -0.4651     | 0.4233   | 0.4017   | 0.9304  | -0.0947     | 0.4714   | 0.4659    |
| HWR                             | 0.0028  | 1.5832      | 0.8471   | 1.0043   | 0.0069  | 2.3596      | 0.8186   | 1.0849    |
| BF                              | 0.6778  | 0.1578      | 1.1913   | 1.2189   | 0.4406  | 0.5946      | 1.163    | 1.2317    |
| BL                              | 0.9998  | -2e-04      | 0.3265   | 0.3265   | 0.8825  | -0.2467     | 0.358    | 0.352     |
| Vdiam [cm]                      | 0.2809  | -2.7641     | 0.2925   | 0.2811   | 0.1065  | -6.7009     | 0.3171   | 0.2879    |
| SizeR                           | 0.1223  | 0.185       | 2.0908   | 2.4138   | 0.0802  | 0.3912      | 2.1326   | 2.7941    |
| VOR                             | 0.8977  | -0.0142     | 0.6823   | 0.6508   | 0.9336  | 0.0257      | 0.6513   | 0.6696    |
| CR                              | 0.4811  | -0.8864     | 0.7701   | 0.7558   | 0.5146  | 1.2238      | 0.7276   | 0.7517    |
| EI                              | 0.2879  | 5.1111      | 0.2682   | 0.2738   | 0.806   | 2.1823      | 0.2729   | 0.2748    |
| NSI                             | 5e-04   | 9.6914      | 0.2048   | 0.2398   | 0.0018  | 17.3643     | 0.2146   | 0.2671    |
| MLN                             | 0.0035  | 5.5893      | 0.297    | 0.3396   | 0.0018  | 10.23       | 0.2963   | 0.3921    |

**Tab. 10** Results of the univariate comparison of sidewall (S) and bifurcation (B) MCA aneurysms (left) and PCOM aneurysms (right). The p-value refers to the Wald test, the coefficient to the coefficient of the fitted univariate logistic regression model

|                                 | <b>p-value</b> | <b>Coefficient</b> | <b>Mean S</b> | <b>Mean B</b> | <b>P-value</b> | <b>Coefficient</b> | <b>Mean S</b> | <b>Mean B</b> |
|---------------------------------|----------------|--------------------|---------------|---------------|----------------|--------------------|---------------|---------------|
| ICI                             | 0.0214         | 2.0647             | 0.2646        | 0.6725        | 0.1815         | 0.2507             | 0.6509        | 0.7762        |
| Q [cm <sup>3</sup> /s]          | 0.0274         | 2.0541             | 0.2458        | 0.5871        | 0.3232         | 0.1423             | 0.7325        | 0.8478        |
| KE [erg]                        | 0.0502         | 0.0044             | 89.1139       | 268.8926      | 0.4597         | -0.0002            | 272.0627      | 237.4847      |
| SR [1/s]                        | 0.2532         | 0.0019             | 189.9832      | 261.6738      | 0.1723         | -0.0009            | 245.864       | 214.5273      |
| VE [cm/s]                       | 0.0166         | 0.1375             | 5.3488        | 9.8881        | 0.5199         | -0.0108            | 10.3339       | 9.7553        |
| VO [1/s]                        | 0.2261         | 0.0015             | 251.7304      | 350.8844      | 0.1297         | -0.0007            | 340.4493      | 292.2398      |
| VD [erg]                        | 0.8006         | 2.5292             | 1517.3022     | 2378.7881     | 0.2972         | -5.0234            | 1687.9486     | 1366.561      |
| WSSmax [dyne/cm <sup>2</sup> ]  | 0.0866         | 0.0036             | 179.2397      | 267.7947      | 0.2291         | 0.0008             | 257.6968      | 293.5638      |
| WSSmin [dyne/cm <sup>2</sup> ]  | 0.7281         | 0.0542             | 0.6904        | 0.9194        | 0.3564         | -0.1070            | 0.478         | 0.3558        |
| WSSmean [dyne/cm <sup>2</sup> ] | 0.2041         | 0.0215             | 16.9147       | 24.9823       | 0.2763         | -0.0062            | 24.2017       | 21.3337       |
| LSA                             | 0.0414         | -0.019             | 70.3673       | 52.1143       | 0.9012         | -0.0005            | 58.0693       | 57.5959       |
| SCI                             | 0.1442         | 0.1386             | 2.71          | 4.3255        | 0.0231         | 0.0546             | 5.0606        | 7.3944        |
| OSImax                          | 0.292          | 1.9292             | 0.2162        | 0.2544        | 0.003          | 3.0117             | 0.2748        | 0.3204        |
| OSImean                         | 0.6698         | 8.1235             | 0.0115        | 0.0134        | 0.0867         | 18.2295            | 0.0133        | 0.0164        |
| WSSves [dyne/cm <sup>2</sup> ]  | 0.7292         | -0.0027            | 49.6029       | 46.9261       | 0.4341         | -0.0038            | 50.4703       | 48.0258       |
| WSSnorm                         | 0.1534         | 1.3264             | 0.3832        | 0.514         | 0.1823         | -0.5664            | 0.4785        | 0.4309        |
| MWSSnorm                        | 0.0076         | 0.3460             | 3.8849        | 5.7264        | 0.0099         | 0.1815             | 5.0907        | 6.063         |
| Corelen [cm]                    | 0.1444         | 0.4291             | 0.6431        | 1.3794        | 0.0591         | 0.09584            | 2.1108        | 2.7845        |
| podent                          | 0.6566         | 0.9289             | 0.1527        | 0.1701        | 0.0309         | 2.4265             | 0.1739        | 0.2098        |
| Vmax [cm/s]                     | 0.0114         | 0.0209             | 46.7945       | 80.3322       | 0.2557         | 0.0032             | 77.0368       | 84.0786       |
| Avol [cm <sup>3</sup> ]         | 0.2427         | 5.3343             | 0.0349        | 0.0989        | 0.6843         | 0.1128             | 0.1657        | 0.1907        |
| Asize [cm]                      | 0.0334         | 2.5442             | 0.423         | 0.611         | 0.0112         | 0.8614             | 0.6968        | 0.8299        |
| Nsize [cm]                      | 0.0037         | 7.2535             | 0.2841        | 0.4015        | 0.0758         | 1.2623             | 0.4142        | 0.4576        |
| Narea [cm <sup>2</sup> ]        | 0.0307         | 10.714             | 0.0752        | 0.1244        | 0.7821         | 0.1758             | 0.1576        | 0.1647        |
| AR                              | 0.8748         | -0.0616            | 1.0086        | 0.9831        | 0.0724         | 0.3076             | 1.1939        | 1.3668        |
| Aheight [cm]                    | 0.1399         | 1.8788             | 0.2831        | 0.3967        | 0.0107         | 1.0855             | 0.4516        | 0.5579        |
| Awidth [cm]                     | 0.0736         | 3.0540             | 0.3154        | 0.4194        | 0.1659         | 0.6577             | 0.4781        | 0.5278        |
| HWR                             | 0.5317         | 0.5321             | 0.8369        | 0.8879        | 8e-04          | 1.3723             | 0.9005        | 1.0435        |
| BF                              | 0.7252         | 0.2605             | 1.1496        | 1.1838        | 0.5626         | 0.1576             | 1.2785        | 1.312         |
| BL                              | 0.0799         | 2.7416             | 0.2437        | 0.3216        | 0.004          | 1.9654             | 0.2955        | 0.3625        |
| Vdiam [cm]                      | 0.2538         | 4.3941             | 0.2691        | 0.2894        | 0.0579         | 3.2135             | 0.3858        | 0.4037        |
| SizeR                           | 0.0835         | 0.5607             | 1.6078        | 2.1717        | 0.186          | 0.1539             | 1.8982        | 2.087         |
| VOR                             | 0.5237         | 0.2699             | 0.4331        | 0.6281        | 0.4146         | 0.0851             | 0.8445        | 0.9743        |
| CR                              | 0.8365         | 0.3961             | 0.7535        | 0.7604        | 0.7758         | 0.3156             | 0.7733        | 0.7772        |
| EI                              | 0.2382         | -9.0825            | 0.2783        | 0.2695        | 0.1278         | -6.1579            | 0.2812        | 0.2754        |
| NSI                             | 0.2078         | 6.2357             | 0.1947        | 0.2137        | 0.0032         | 6.5107             | 0.2244        | 0.2464        |
| MLN                             | 0.0419         | 6.6938             | 0.2578        | 0.3059        | <0.001         | 6.2396             | 0.304         | 0.3602        |
